# Supplementary material
Source: publisher site journal article supplement (https://www.dovepress.com/article/331076)
Supplement: Supplementary file 1 [file get_supplementary_file.php]

**Supplementary Table 1** Evaluating AML or ALL by PKM2

| Parameter | AUC (95%CI) | P value | Sensitivity (%) | Specificity (%) | Youden index |
| --- | --- | --- | --- | --- | --- |
| PKM2-AML | 0.827  (0.8214-0.9371) | ＜0.001 | 91.2% | 66.7% | 0.579 |
| PKM2-ALL | 0.837  (0.8214 -0.9371) | ＜0.001 | 88.2% | 66.7% | 0.549 |

**Notes:** PKM2 could distinguish the AML patients from the healthy individuals, and the AUC was 0.827. Moreover, the sensitivity was 91.2%, and the specificity was 66.7%. PKM2 could distinguish the ALL patients from the healthy individuals, and the AUC was 0.837. Moreover, the sensitivity was 88.2%, and the specificity was 66.7%.

**Supplementary Table 2** The baseline data of survival

|  | AMLPKM2LOW | AMLPKM2high | p | ALLPKM2LOW | ALL PKM2high | p |
| --- | --- | --- | --- | --- | --- | --- |
| Age (>60) | 5 | 6 | 0.346 | 1 | 3 | a |
| Age (<60) | 22 | 23 | 0.538 | 19 | 17 | 0.135 |
| Gender (man) | 17 | 20 | 0.635 | 12 | 12 | 1.000 |
| Gender (women) | 10 | 9 | 8 | 8 |
| LN(low) | 18 | 3 | ＜0.001 | 12 | 4 | 0.019 |
| LN(intermediate) | 5 | 9 | 5 | 6 |
| LN(high) | 4 | 17 | 3 | 10 |

**Notes:** a: The number of cases is too small to calculate. There was no statistical difference in PKM2 expression between age and sex. The higher the level of Risk stratification, the higher the expression level of PKM2, and the two are positively correlated.
